# Supplementary material
Source: PubMed Central journal article supplement (PMC8277755)
Supplement: NIHMS1715265-supplement-5.pdf [file NIHMS1715265-supplement-5.pdf]

## Cohort Breakdown

A summary of the initial states and disease progression outcomes and how they change, depending on the maximum initial amount of Ee allowed (exclusion group), time at which outcome is determined, and type of sampling distribution.

Numbers in parentheses are the number of sets that leave the state and enter the state at the end of the simulation for initial condition (IC) and ending state (ES), respectively.

|                                                 | Log-uniform, 200h |             |             | Log-uniform, 2h | Log-normal  |
|-------------------------------------------------|-------------------|-------------|-------------|-----------------|-------------|
| Initial condition criteria:                     | Ee(0)<75%         | Ee(0)<50%   | Ee(0)<25%   | Ee(0)<50%       | Ee(0)<50%   |
| Total number of sets that reached steady-state: | 24798             | 22432       | 23517       | 22432           | 33256       |
| Healthy IC:                                     | 16833 (635)       | 16833 (635) | 16833 (635) | 16833 (14260)   | 21403 (37)  |
| Health ES:                                      | 16198 (0)         | 16198 (0)   | 16198 (0)   | 2573 (0)        | 21373 (7)   |
| Moderate damage IC:                             | 5382 (572)        | 5382 (572)  | 4697 (265)  | 5382 (3387)     | 10892 (155) |
| Moderate damage ES:                             | 5105 (295)        | 5104 (294)  | 4726 (294)  | 10116 (8121)    | 10771 (34)  |
| Moderate damage IC:                             | 2583 (1)          | 2217 (0)    | 1987 (0)    | 2217 (0)        | 961 (0)     |
| Moderate damage ES:                             | 3495 (913)        | 3130 (913)  | 2593 (606)  | 11743 (9526)    | 1112 (151)  |

## Top Correlations

The parameters that have the highest correlation with parameters and other predictors, for each exclusion group and disease progression group.

|                 | Log-uniform         |           |           | Log-uniform, 2h     | Log-normal          |
|-----------------|---------------------|-----------|-----------|---------------------|---------------------|
| Criteria:       | Ee(0)<75%           | Ee(0)<50% | Ee(0)<25% | Ee(0)<50%           | Ee(0)<50%           |
|                 | kmne, Eh ratio 0.5h |           |           | kmne, Eh ratio 0.5h | kmne, Eh ratio 0.5h |
| Healthy         | 0.1                 | 0.1       | 0.1       | 0.24                | 0.06                |
| Moderate damage | 0.66                | 0.66      | 0.66      | 0.43                | 0.47                |
| Severe damage   | 0.55                | 0.87      | 0.86      | 0.73                | 0.67                |
|                 | br, Eh ratio 0.5h   |           |           | br, Eh ratio 0.5h   | br, Eh ratio 0.5h   |
| Healthy         | 0.29                | 0.29      | 0.29      | -0.04               | 0.19                |
| Moderate damage | 0.42                | 0.42      | 0.43      | 0.27                | 0.23                |
| Severe damage   | 0.05                | 0.18      | 0.22      | 0.32                | 0.22                |
|                 | sm, max M2          |           |           | sm, max M2          | sm, max M2          |
| Healthy         | 0.32                | 0.32      | 0.32      | 0.28                | 0.48                |
| Moderate damage | 0.31                | 0.31      | 0.31      | 0.32                | 0.51                |
| Severe damage   | 0.4                 | 0.29      | 0.3       | 0.32                | 0.52                |

# Significance Testing

Parameters and other predictors that show a statistically significant difference (p-value<0.05) between all three disease progression groups, using Kruskal-Wallis and Wilcoxon tests.

|                         | Log-uniform      |                  |                  | Log-uniform, 2h  | Log-normal     |
|-------------------------|------------------|------------------|------------------|------------------|----------------|
| Criteria:               | Ee(0)<75%        | Ee(0)<50%        | Ee(0)<25%        | Ee(0)<50%        | Ee(0)<50%      |
| Significant predictors: | kmne             | kmne             | kmne             | kep              | kmne           |
|                         | xmne             | xmne             | xmne             | br               | xmne           |
|                         | M2% at 10h       | M2% at 10h       | br               | Eh ratio at 0.5h | Eh ratio at 2h |
|                         | min M2           | min M2           | M2% at 10h       | Eh ratio at 2h   | mup            |
|                         | M1 peak time     | br               | ken              | Eh ratio at 6h   | ken            |
|                         | Eh ratio at 2h   | Eh ratio at 2h   | min M2           | min M1           | kep            |
|                         | min M1           | M1 peak time     | min M1           | ken              | M1 peak ratio  |
|                         | kep              | kep              | Eh ratio at 2h   | sn               | br             |
|                         | br               | min M1           | M1 peak ratio    | max M1           | M1 peak time   |
|                         | M1 peak ratio    | M1 peak ratio    | kep              | min M1%          | min M1%        |
|                         | Eh ratio at 0.5h | Eh ratio at 0.5h | Eh ratio at 0.5h | kan              | M2 peak time   |
|                         | mup              | mup              | kem1             | max M1%          | kem1           |
|                         | kem1             | kem1             | bp               | kem1             | sn             |
|                         | kpe              |                  |                  | M1 peak time     | M2% at 10h     |
|                         |                  |                  |                  | kam1             | ainf           |
|                         |                  |                  |                  | muna             |                |
|                         |                  |                  |                  | max M2%          |                |
|                         |                  |                  |                  | kn               |                |
|                         |                  |                  |                  | mup              |                |
|                         |                  |                  |                  | min M2%          |                |
|                         |                  |                  |                  | ainf             |                |
|                         |                  |                  |                  | sm               |                |
|                         |                  |                  |                  | M2% at 10h       |                |
|                         |                  |                  |                  | muab             |                |
|                         |                  |                  |                  | kpm1             |                |
|                         |                  |                  |                  | kmne             |                |
|                         |                  |                  |                  | bp               |                |
|                         |                  |                  |                  | knn              |                |
|                         |                  |                  |                  | xm0ab            |                |
|                         |                  |                  |                  | mum1b            |                |

# Random Forest Decision Tree

Ten highest average importance values, as determined by 1000 random forests.

|                    | Log-uniform, 200h |                  |                  |  | Log-uniform, 2h  |  | Log-normal       |
|--------------------|-------------------|------------------|------------------|--|------------------|--|------------------|
| Criteria:          | Ee(0)<75%         | Ee(0)<50%        | Ee(0)<25%        |  | Ee(0)<50%        |  | Ee(0)<50%        |
| Top ten, in order: | kmne              | kmne             | kmne             |  | Eh ratio at 2h   |  | kmne             |
|                    | Eh ratio at 6h    | Eh ratio at 6h   | Eh ratio at 6h   |  | Eh ratio at 0.5h |  | xmne             |
|                    | Eh ratio at 2h    | xmne             | xmne             |  | Eh ratio at 6h   |  | Eh ratio at 2h   |
|                    | xmne              | Eh ratio at 2h   | Eh ratio at 2h   |  | kmne             |  | Eh ratio at 0.5h |
|                    | min M1            | min M1           | Eh ratio at 0.5h |  | br               |  | Eh ratio at 6h   |
|                    | Eh ratio at 0.5h  | Eh ratio at 0.5h | min M1           |  | kep              |  | mup              |
|                    | min M2            | min M2           | min M2           |  | xmne             |  | min M1           |
|                    | M2% at 10h        | M2% at 10h       | M2% at 10h       |  | min M1           |  | ken              |
|                    | br                | br               | br               |  | ken              |  | min M1%          |
|                    | ken               | ken              | ken              |  | sn               |  | kep              |
